# Supplementary material for: Stakeholder perceptions about the establishment of medical simulation-based learning at a university in a low resource setting: A qualitative study in Uganda
Source: Research Square preprint supplement (doi:10.21203/rs.3.rs-27026/v3), 2020-10-14
Supplement: Supplementary file 1 [file cd131cb50f76e17f6b761d35.docx]

## Interview guide for students

Potential Beneficiary In-depth Interview Guide

**Introduction:**

Hello _______, my name is _______ and I would like to conduct an interview with you today. The purpose of this interview is to evaluate different perspectives of SIM based medical education and the methodology of teaching that is used in simulation, and to see if that changes over time. This interview is part of a larger research study which is working to establish simulation based teaching and training and evaluate not only perspectives but effectiveness and changes related to the integration of SIM in medical education for trainees and in service providers. As you may or may not know, I am a ___________/Research Assistant working with this part of the study, and I have done similar interviews for other studies before. As a part of this work, it is important that you discuss your views on simulation with me openly and honestly---if you are agreeable I will record the interview for later transcription, if not I will be taking notes during our discussion. For analysis and publications your response will be de-identified and classified as a “faculty, administrator, advanced trainee, or student trainee” along with your area of medical specialty (for faculty and advanced trainees) or your year of schooling (for medical and nursing students). Each individual interview will also be numbered. There will be one file linking your name and contact information with this number which will be saved on an encrypted secure laptop so that we can contact you for future surveys as we would like to view how perspectives change or remain the same over time. In addition, if you identify any member of staff/other students by name during your interview this will be replaced with (“faculty” or “trainee” or “colleague” during transcription). The text or notes from these interviews including important emerging themes will be shared with the group responsible for developing the SIM program and training curriculum so that they can tailor the program to address any needs or challenges that are identified.

If you are agreeable, we will be begin our discussion now.

(If yes, sign ICF and continue with interview. If no, record as non-responder. If an issue is timing consider rescheduling the interview).

**Questions:**

1. What are some challenges that you (and your trainees) face in ongoing medical education?
2. Describe to me what medical simulation is
3. Tell me about your experiences if you have participated in medical simulation? If you have not participated in medical simulation, are there specific reasons or challenges to why?
   1. **(For /trainees who have served as facilitators (a predetermined group))**: Tell me about the training you received prior to your service as a facilitator.
   2. **(For those who have not served as facilitators but have participated in a sim session).** Tell me about the most recent simulation experience you had.
      1. What do you see as the benefits or challenges you experienced during your simulation session?
      2. What are the good and bad parts about this type of teaching?
      3. Tell me about the facilitator of your simulation session—did you notice a difference in how he or she taught compared to your experiences with live patients on the wards?
4. We are discussing simulation efforts within a range of specialties and different levels of experience including students, nurses, junior and senior faculty, and administrators. Who can and who cannot benefit from simulation training?
5. Are you satisfied with the amount of simulation training you and the (trainees in your department)/(other students) are experiencing currently? If not, in what way would you adjust the amount?
6. Do you have any specific recommendations or comments for the group invested in building this simulation program as we move forward?
7. Any other specific comments or thoughts you would like to share based on our discussion?

Thank you for your time and your participation in this interview. Are there any questions you would like to ask me at this time? We may be contacting you in the future to discuss similar themes with you—would that be acceptable?

[This ends the interview and I will stop (tape recorder/taking notes)].

Thank you very much.
